# Supplementary material for: Mechanism and control of “coffee-ring erosion” phenomena in structurally colored ionomer films
Source: Royal Society of Chemistry journal article supplement (doi:10.1039/c9sm02457c), 2020-01-01
Supplement: c9sm02457c1.pdf [file c9sm02457c1.pdf]

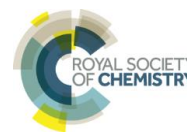

Soft Matter

## Supplementary Information

---

### Mechanism and control of “coffee-ring erosion” phenomena in structurally colored ionomer films

Sabina Islam and Orlin D. Velev\*

*Department of Chemical and Biomolecular Engineering, North Carolina State University,  
Raleigh, NC 27695, USA*

\* E-mail: [odvelev@ncsu.edu](mailto:odvelev@ncsu.edu)

| INDEX      | Page number |
|------------|-------------|
| Table S1   | S2          |
| Table S2   | S2          |
| Figure S1  | S3          |
| Figure S2  | S4          |
| Table S2   | S5          |
| Figure S3  | S6          |
| Figure S4  | S7          |
| Figure S5  | S8          |
| Figure S6  | S9          |
| Figure S7  | S10         |
| Figure S8  | S11         |
| Figure S9  | S12         |
| Figure S10 | S13         |

**Table S1: Composition of the sulfopolyesters**

| <b>Polyester<br/>Sample No.</b> | <b>%Acid moiety</b> |              | <b>%Glycol moiety</b> |            | <b>Molecular weight</b> |                      |
|---------------------------------|---------------------|--------------|-----------------------|------------|-------------------------|----------------------|
|                                 | <b>IPA</b>          | <b>SSIPA</b> | <b>CHDM</b>           | <b>DEG</b> | <b>M<sub>n</sub></b>    | <b>M<sub>w</sub></b> |
| 1                               | 82                  | 18           | 25                    | 75         | 4925                    | 16921                |
| 2                               | 91                  | 9            | 46                    | 54         | 10515                   | 29382                |
| 3                               | 82                  | 18           | 75                    | 25         | 9855                    | 19742                |
| 4                               | 73                  | 27           | 46                    | 54         | 10180                   | 20552                |
| 5                               | 82                  | 18           | 46                    | 54         | 10301                   | 21358                |
| 6                               | 82                  | 18           | 46                    | 54         | 12486                   | 27510                |
| 7                               | 82                  | 18           | 46                    | 54         | 7240                    | 18200                |

**Table S2: Composition of carboxylated polyester**

| <b>Polyester<br/>Sample No.</b> | <b>%Acid<br/>moiety</b> | <b>%Glycol<br/>moiety</b> | <b>%carboxylate<br/>moiety</b> | <b>Molecular weight</b> |                      |
|---------------------------------|-------------------------|---------------------------|--------------------------------|-------------------------|----------------------|
|                                 | <b>CHDA<sup>1</sup></b> | <b>TMCD<sup>2</sup></b>   | <b>DMPA<sup>3</sup></b>        | <b>M<sub>n</sub></b>    | <b>M<sub>w</sub></b> |
| 9                               | 100                     | 100                       | 20                             | 2952                    | 8248                 |

<sup>1</sup>CHDA: 1,4-Cyclohexanedicarboxylic Acid<sup>2</sup>TMCD: 2,2,4,4-Tetramethyl-1,3-cyclobutanediol<sup>3</sup>DMPA: Dimethylolpropionic acid

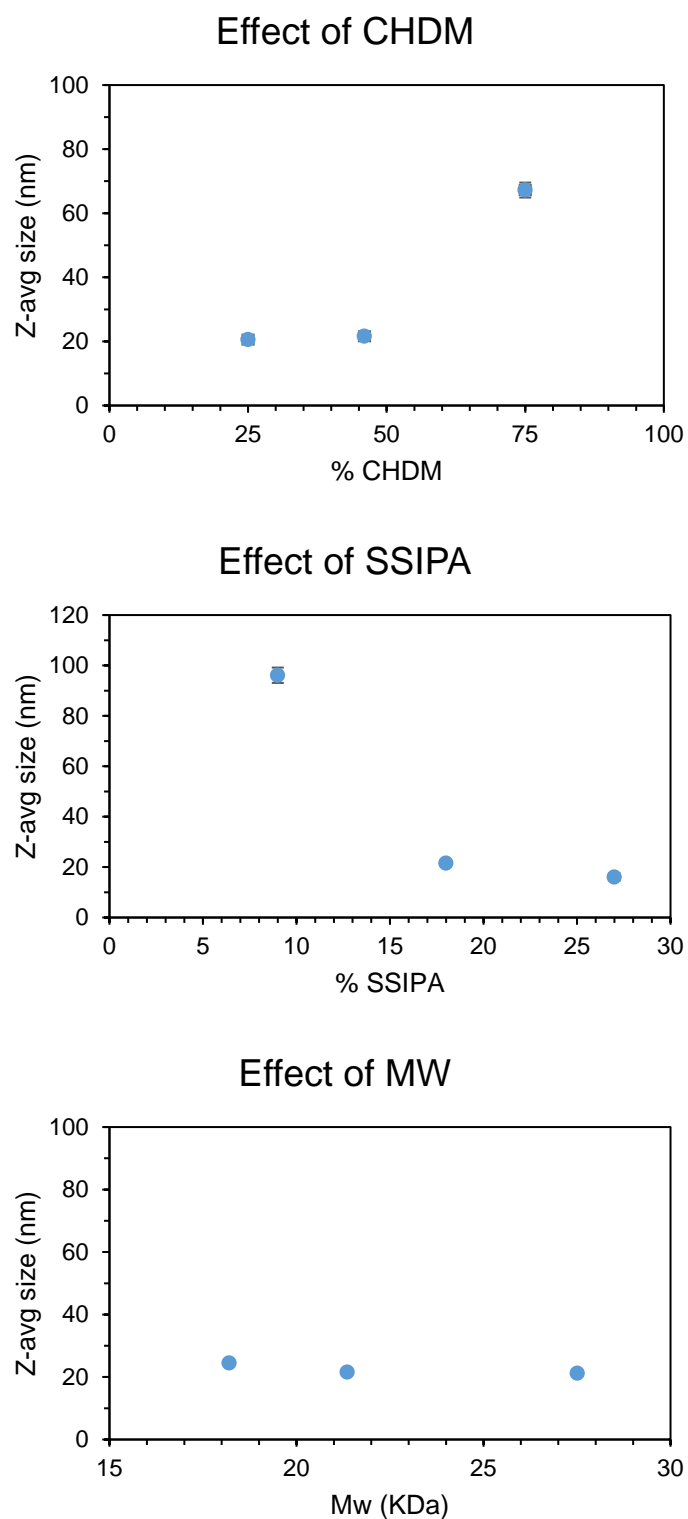

**Fig. S1** The hydrodynamic diameter of the polyester nanoparticles from DLS experiment. The size of the nanoparticles varied with polyester composition whereas molecular weight had no effect on the nanoparticle size.

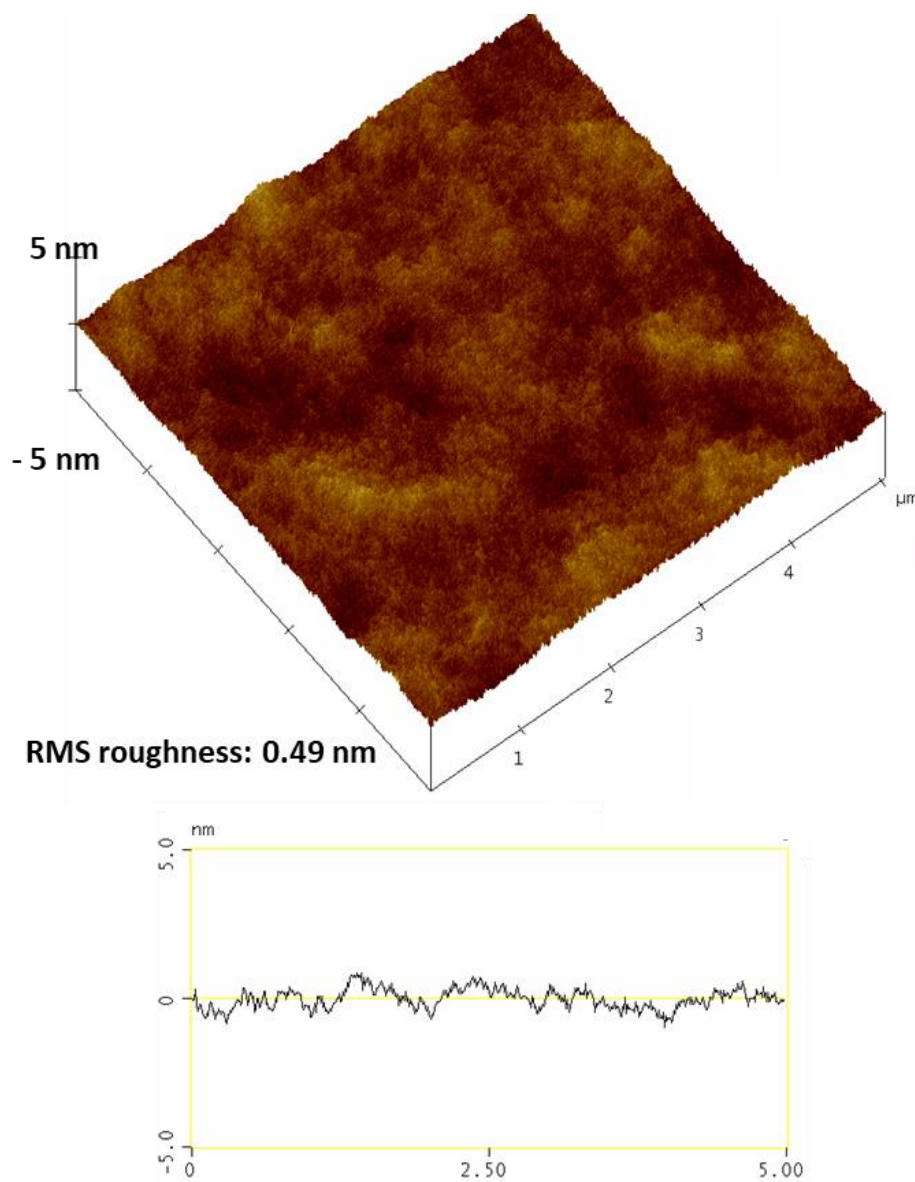

**Fig. S2** AFM with sulfopolyesters nanofilm.

**Table S3: Correlation of film thickness with structural color.**

| Film No. | Thickness of film<br>t (nm) | Constructive interference wavelength calculated from Eqn 5<br>$\lambda$ (nm) |            |       |       | Predicted color for visible wavelengths when m =2 | Actual structural colors on the films                                                |
|----------|-----------------------------|------------------------------------------------------------------------------|------------|-------|-------|---------------------------------------------------|--------------------------------------------------------------------------------------|
|          |                             | m = 1                                                                        | m = 2      | m = 3 | m = 4 |                                                   |                                                                                      |
| #1       | 275                         | 860                                                                          | <b>430</b> | 286   | 215   | <b>430 nm</b>                                     |   |
| #2       | 325                         | 1007                                                                         | <b>503</b> | 335   | 251   | <b>503 nm</b>                                     |   |
| #3       | 365                         | 1132                                                                         | <b>565</b> | 377   | 283   | <b>565 nm</b>                                     |  |

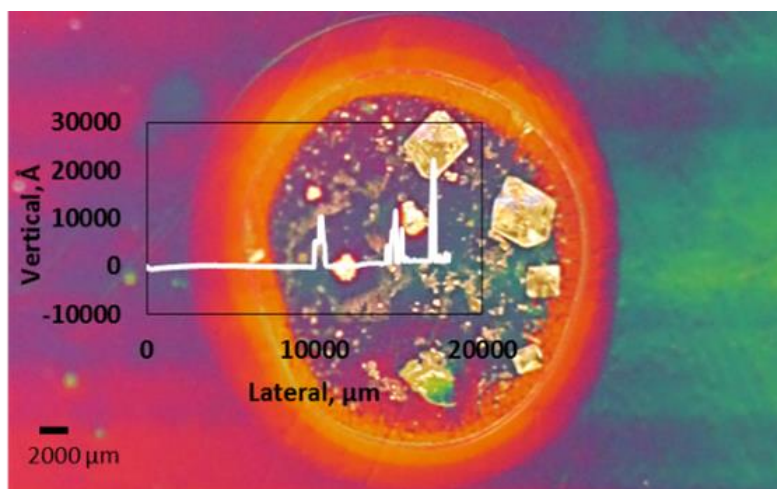

**Fig. S3** Profilometry thickness profile of pattern generated as a result of NaCl solution evaporation overlaid on polyester film shows the erosion phenomenon was suppressed in presence of electrolyte.

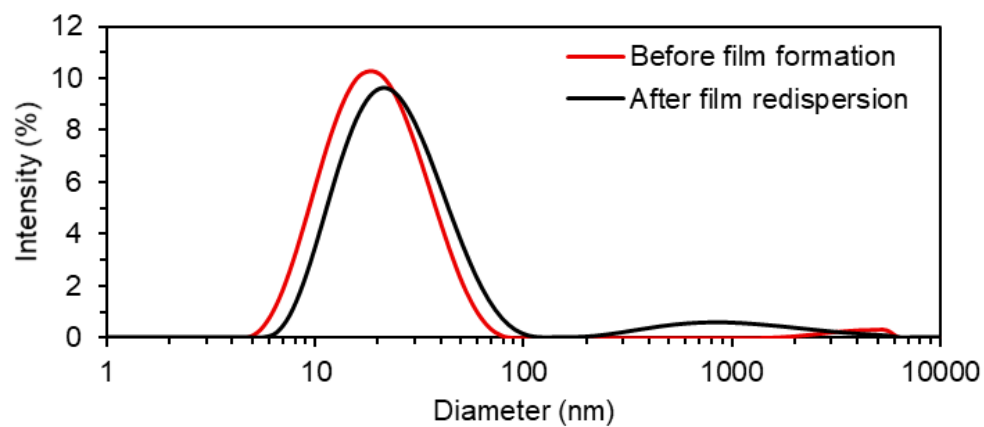

**Fig. S4** DLS with polyester nanoparticle before film formation (original dispersion) and after film redispersion in the damaging water droplet.

**a**

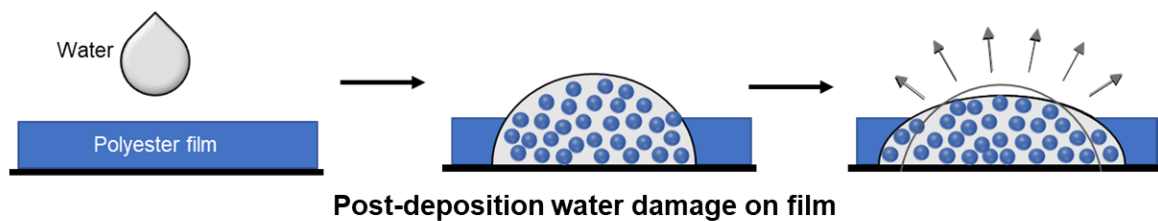

**b**

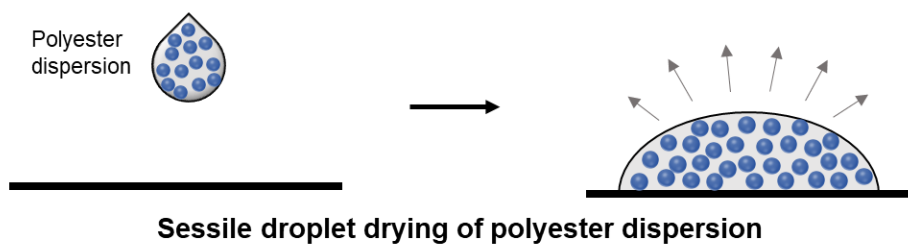

**Fig. S5 (a)** Dried profile is a complex function of nanoparticle redispersion and water evaporation. **(b)** Sessile droplet drying of polyester dispersion can be used to understand the effect of evaporation first.



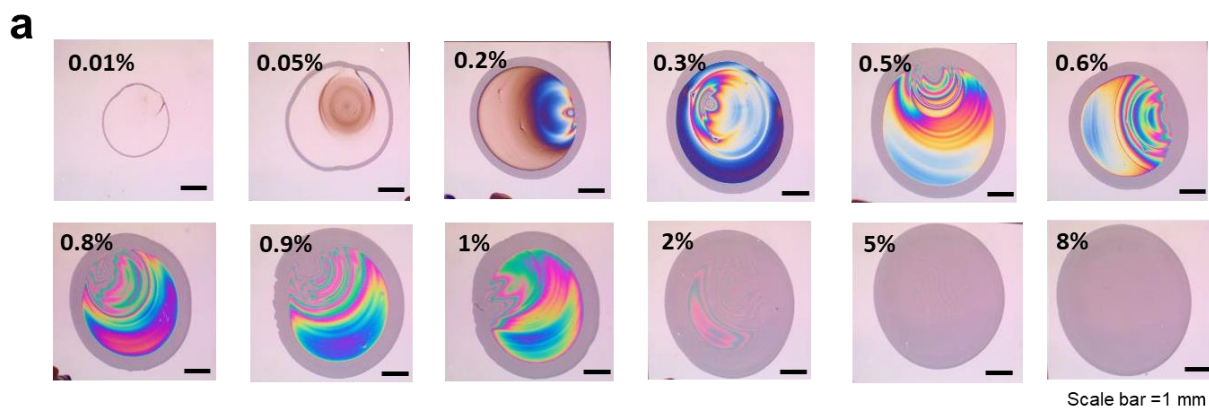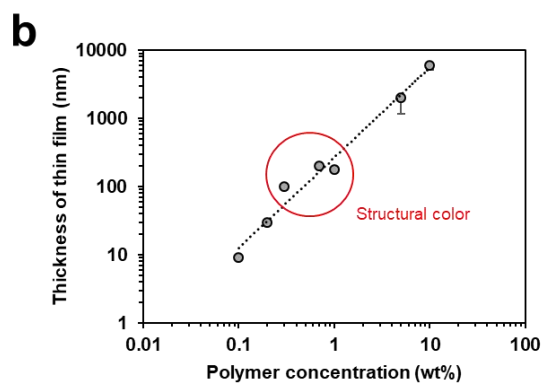

**Fig. S6 (a)** Coffee-ring formation for all concentrations, **(b)** thickness of the thin film inside of the deposited pattern as a function of polymer concentration. Structural color inside the film depends on a strict concentration range of the polymer dispersion.

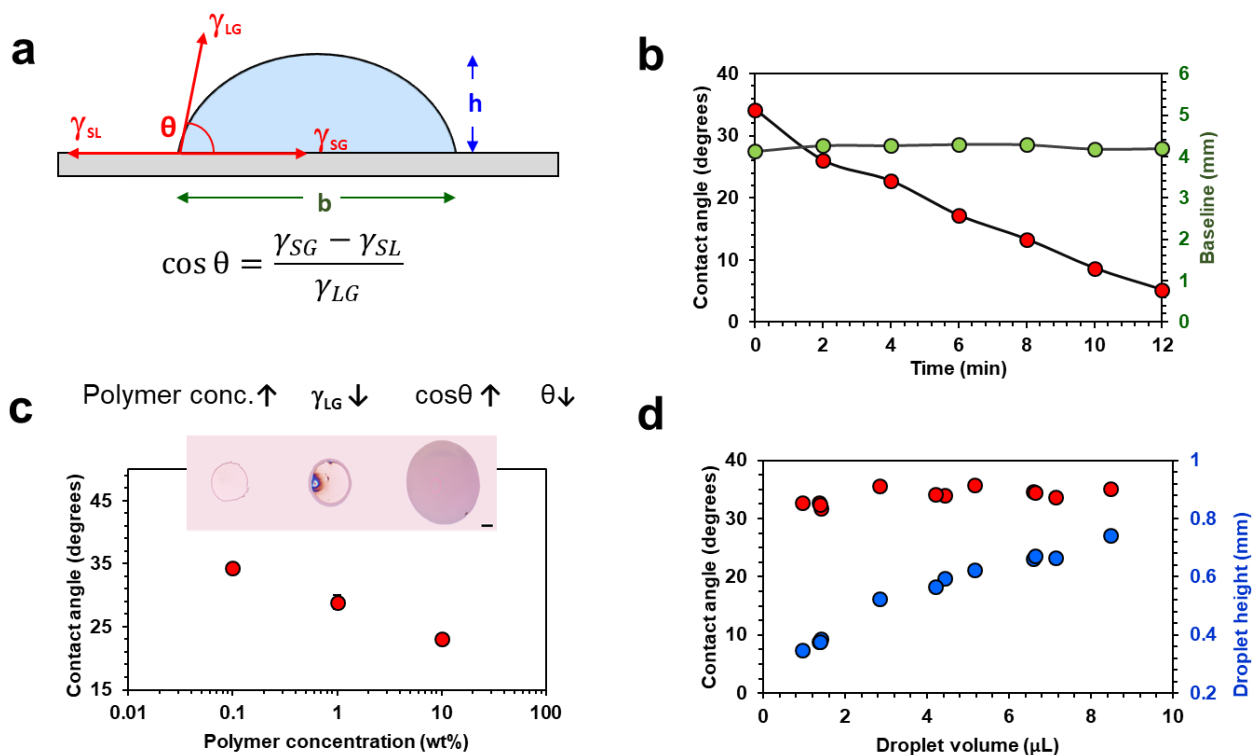

**Fig. S7** (a) Schematic of sessile polyester dispersion droplet from side-angle where  $\theta$  denotes the contact angle,  $b$  denotes the diameter of the contact area (baseline),  $h$  denotes the droplet height, (b) change in contact angle as a function of time during droplet evaporation showing constant contact area based evaporation, (c) contact angle of the dispersion droplet as a function of polymer concentration, (d) contact angle and the height of the dispersion droplet as a function of droplet volume.

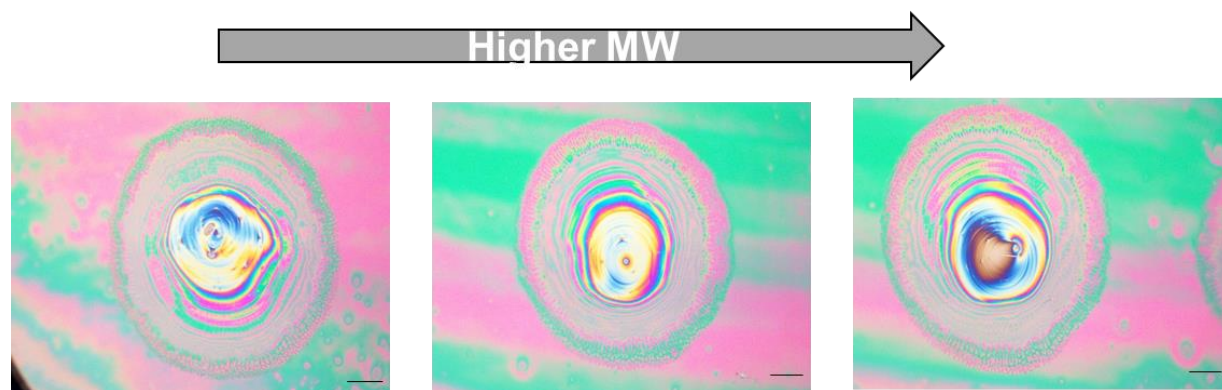

**Fig. S8 Effect of MW on the coffee-ring erosion.** MW had no effect on the coffee-ring erosion as all three polyester experienced similar water damage. Scale bar indicates 1 mm.

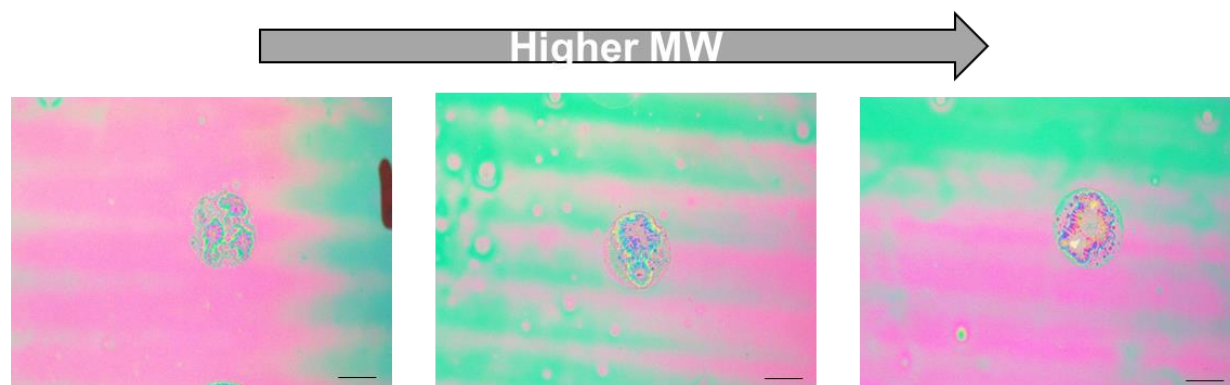

**Fig. S9 Effect of MW on the coffee-ring erosion of the heat-treated films.** The water resistance was improved to the same extent for the varying MW of the polyesters. Scale bar indicates 1 mm.

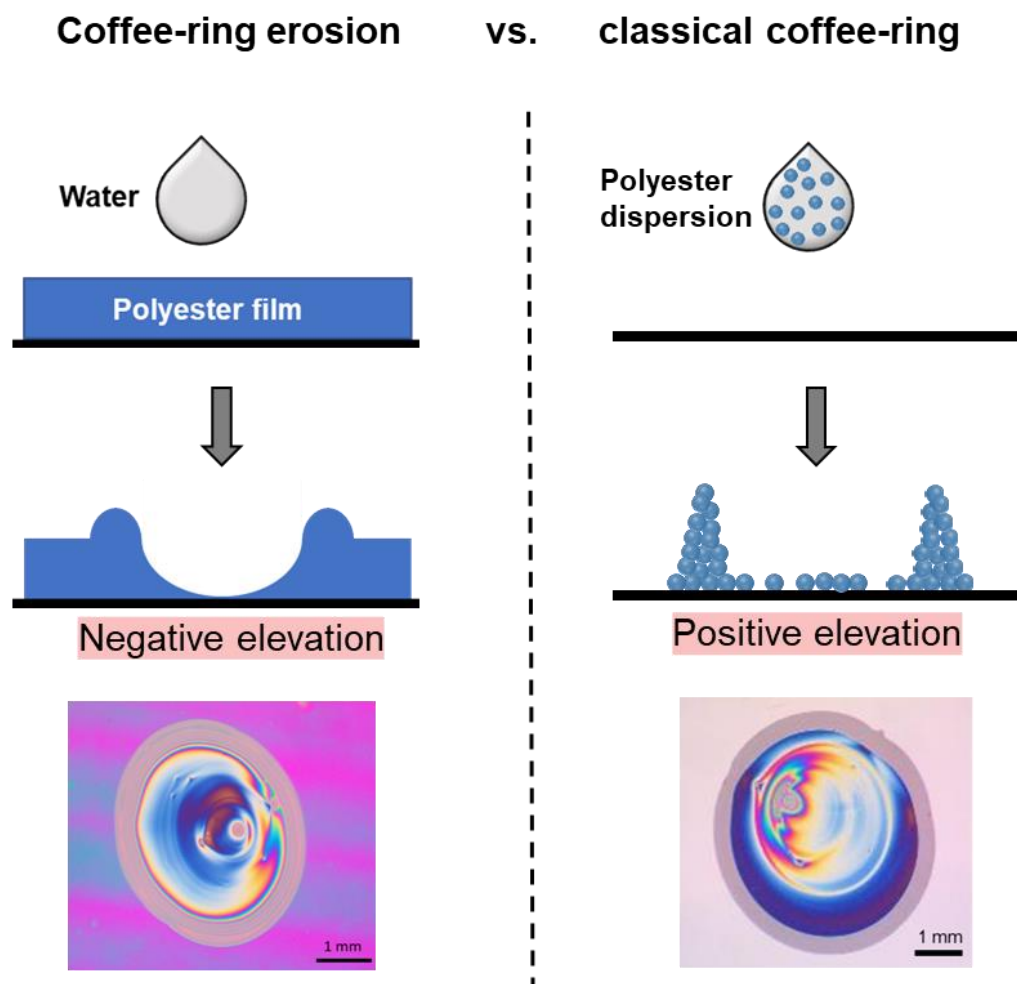

**Fig. S10. Coffee-ring erosion vs. classical coffee-ring phenomenon.** **Coffee-ring erosion:** Post-deposition water damage on polyester film is a complex function of nanoparticle redispersion and water evaporation. **Classical coffee-ring:** Sessile droplet drying of polyester dispersion creates similar deposition profile as coffee-ring erosion and therefore sessile droplet drying can be used to understand the drying nature of the polyester nanoparticles.
